1 Applying item response theory to psychometrically evaluate and shorten the Negative Acts

2 Questionnaire-Revised

3 Item response theory and short form of the Negative Acts Questionnaire-Revised

4

5

6 Anna M. Dåderman<sup>1\*</sup>, Petri J. Kajonius<sup>1,2\*</sup>, & Beata A. Basinska<sup>3</sup>

7

8 <sup>1</sup> Department of Social and Behavioral Studies, University West, Trollhättan, Sweden

9 <sup>2</sup> Department of Psychology, Lund University, Lund, Sweden

10

11 <sup>3</sup> Faculty of Management and Economics, Gdansk University of Technology, Gdansk, Poland

12

13

14 \*Corresponding authors

15 E-mail: [petri.kajonius@psy.lu.se](mailto:petri.kajonius@psy.lu.se) (PJK)

16 E-mail: [annadaderman@gmail.com](mailto:annadaderman@gmail.com) (AMD; the submitting author)

17

18

19

20

21

22

23 NOTE: This preprint reports new research that has not been certified by peer review and should not be used to guide clinical practice.

## 24 **Abstract**

25 Workplace bullying (WB) assessment often relies on the Negative Acts Questionnaire-  
26 Revised (NAQ-R). This study aimed to shorten and improve the NAQ-R using Item Response  
27 Theory (IRT) and address sex bias. IRT analysis from 867 Swedish employees (66% women)  
28 identified less-informative items. Based on this, a 13-item NAQ-R Short Form (NAQ-R-SF)  
29 was developed, demonstrating strong discrimination and validity. The new NAQ-R-SF  
30 showed a significant correlation with a primary WB measure ( $r = .57$ ) and other relevant  
31 constructs, including individual factors like neuroticism and health quality, as well as work-  
32 related factors such as interpersonal conflicts and work performance. Sex bias was not found.  
33 IRT and validity evidence support the NAQ-R-SF as a robust tool for measuring WB,  
34 aligning with established WB constructs and individual differences.

## 35 **Introduction**

36 This study focuses on the experience of workplace bullying (WB), specifically, the  
37 victimization aspect. WB, prevalent among colleagues or supervisors, manifests persistently  
38 and repeatedly toward an employee who lacks defense. One widely accepted definition of WB  
39 is provided by Einarsen et al. [1]:

40 The term bullying refers to situations where an employee is persistently picked on or  
41 humiliated by leaders or fellow co-workers. A person is bullied or harassed when he or  
42 she feels repeatedly subjected to negative acts in the workplace, acts that the victim may  
43 find difficult to defend himself or herself against (p. 382-283).

44 Meta-analyses and reviews examining WB reveal its prevalence across industries and  
45 countries, exploring outcomes, mental health impact, and associated psychosocial factors [2].  
46 They underline its frequency variation across workplaces and its diverse forms. WB is  
47 consistently linked to adverse mental health effects, including stress, anxiety, depression, and

48 physical health issues [3-8], and to individual differences in personality traits [9,10]. These  
49 effects significantly impact the well-being of employees who experience WB, influencing  
50 their overall health quality and workplace functioning, such as interpersonal conflicts and  
51 work performance. Identifying patterns, predictors and risk factors—power imbalances,  
52 culture, and personality traits—guides intervention strategies.

53 The Negative Acts Questionnaire-Revised (NAQ-R) [11], a 22-item scale, remains  
54 prominent in WB measurement. Notelaers et al. [12] strongly advocate for shortening the  
55 NAQ-R and have delineated existing abbreviated measures derived from it. While these  
56 measures were developed using conventional Classical Test Theory (CTT) methods and  
57 expert consensus, none have utilized Item Response Theory (IRT) for abbreviation, despite its  
58 suitability for scale abbreviation. A condensed 9-item version (S-NAQ), as outlined by  
59 Notelaers et al. [12], has been distributed at two conferences to assess its applicability across  
60 various cultures. However, the process for selecting the items within the S-NAQ remains  
61 undisclosed. The selection process for the S-NAQ resulted in the exclusion of most items with  
62 the content related to work-related and physically intimidating bullying. Consequently, the  
63 short form (S-NAQ) primarily represents person-related bullying.

64 Expanding beyond the 9-item S-NAQ allows for a more detailed examination of WB.  
65 Additional items can explore specific nuances overlooked by the S-NAQ, providing richer  
66 data for intervention studies, ambulatory examination, or screening purposes. For instance,  
67 the S-NAQ fails to capture experiences such as having one's opinions disregarded or  
68 encountering workplace humiliation. By evaluating all 22 items of the NAQ-R and selecting  
69 the most informative ones through item analysis, a comprehensive yet concise scale can be  
70 developed, ensuring reliable, effective and valid measurement of WB.

71

72

## 73 **Item response theory**

74 IRT remains underutilized in WB research. IRT offers three primary advantages. Firstly,  
75 IRT models effectively utilize all available data, unlike confirmatory factor analysis (CFA)  
76 which relies solely on summary statistics [13]. Secondly, IRT models account for the ordinal  
77 nature of items and prioritize understanding the performance of each individual item [14].  
78 Thirdly, reliability coefficients in classical test theory (e.g., Cronbach's alpha) assume  
79 uniform standard error of measurement across the latent variable continuum. In contrast, IRT  
80 models integrate item characteristics and recognize that reliability of person scores may vary  
81 across different levels of the latent variable. Consequently, they can derive conditional  
82 reliability, which reflects reliability across the latent continuum [14].

83 Overall, IRT presents a data-driven and statistically robust method for shortening scales.  
84 In IRT, parameters  $a$  (item discrimination) and  $b$  (item location, also known as item threshold  
85 or item difficulty) are vital for evaluating individual item performance and overall evaluation  
86 effectiveness in measuring the intended latent trait. These parameters provide numerical  
87 insights into item behavior within the test, derived from responses of test takers.  
88 Understanding these parameters aids in gauging item functionality and the information they  
89 convey about the latent trait being measured (e.g., WB). Utilizing IRT's capacity to evaluate  
90 individual items, pinpoint redundant or problematic ones, and address issues like differential  
91 item functioning (DIF) while tailoring evaluations, IRT enables the development of shorter,  
92 more efficient, and precise scales compared to CTT [14]. Notably, the earlier formulated 9-  
93 item NAQ-R version, S-NAQ [12], lacked IRT methodology in its development, leaving  
94 uncertainties about the item selection process. In our study, we apply IRT to evaluate the 22-  
95 item NAQ-R scale, selecting the most informative items to create a shortened version, while  
96 also evaluating the existing 9-item scale with the goal of enhancing its quality. IRT

97 application in shortening the NAQ-R or identifying possible sex-related biases in response  
98 patterns is notably scarce.

## 99 **Unexplored differential item functioning in NAQ-R**

100 The evidence regarding sex-related differences in victimization rates presents a complex  
101 picture. While certain studies emphasize a higher incidence of victimization among females,  
102 conflicting findings exist. For instance, while some studies indicate a prevalence of female  
103 victims over males [15], Notalaers et al. [16] pointed out that among 15 studies, four reported  
104 more female victims. Consequently, these comparisons might be misleading as it is unclear  
105 whether the divergence in NAQ-R outcomes represents an authentic distinction or stems from  
106 factors like different interpretations of survey items between men and women. It may be  
107 evaluated by DIF in a scale. Significantly, research on sex biases in NAQ-R responses is  
108 scarce. However, Sischka et al. [17] found no sex-related measurement differences in another  
109 WB measure. Hence, we didn't expect sex-related disparities in NAQ-R interpretation. We  
110 assert that conclusive evidence on this matter is still lacking. DIF may stem from varied  
111 interpretations of survey items and diverse bullying experiences across sexes. Organizational  
112 members might display unique negative behaviors towards men and women due to gender  
113 stereotypes. For instance, women's opinions may be dismissed more often, while men may  
114 face more practical jokes. In summary, crucial gaps in current research on NAQ-R include  
115 utilizing advanced methodologies such as IRT for refining measurement approaches, and  
116 addressing potential sex-related bias.

## 117 **Current study**

118 Building upon the overview provided earlier, this study aims to address two critical gaps  
119 in the existing literature. Firstly, our study focuses on shortening the still widely-used 22-item  
120 NAQ-R. We apply methodologies explicitly designed to identify the most informative items  
121 and evaluate the item quality chosen for the creation of the relatively recently published 9-

122 item S-NAQ [12]. Secondly, it aims to discern whether in some studies observed sex-related  
123 differences in WB are authentic or stem from psychometric variations in certain NAQ-R  
124 items between men and women.

125 The primary objectives of this study were to apply IRT to psychometrically analyze the  
126 items of the NAQ-R and S-NAQ, assess the overall scale properties, and create an abbreviated  
127 version of the NAQ-R. Additionally, we aimed to investigate potential DIF across sexes. We  
128 also sought to evaluate the comparability of the 22-item NAQ-R, the 9-item S-NAQ, and the  
129 newly developed abbreviated version, the NAQ-R-SF, in terms of key psychometric  
130 properties such as item parameters, reliability, and concurrent validity. Additionally, we  
131 assessed the convergent and divergent validity of the NAQ-R-SF by examining its  
132 correlations with constructs highlighted in WB meta-analyses, including individual  
133 differences in health quality, personality traits, and workplace functioning (e.g., interpersonal  
134 conflicts and job performance). Our study successfully met these objectives.

## 135 **Materials and methods**

### 136 **Participants and procedure**

137 The study included employees from various organizations in Sweden. The majority (60%)  
138 worked in social services, healthcare, and welfare, while the remaining participants were  
139 employed in diverse professions such as technical roles, restaurant management, office work,  
140 teaching, and security. Participants did not receive any compensation.

141 Data were collected initially through paper-based methods from January 1<sup>st</sup>, 2015 ( $n =$   
142 204) and electronically from January 1<sup>st</sup> 2015 to December 31<sup>st</sup> 2019 via social media ( $n =$   
143 663) using a snowball sampling technique. Written individual consent was collected at the  
144 start of the survey. The online and pencil-and-paper versions of the questionnaire, NAQ-R,  
145 showed no differences in content, delivery, functionality, or user experience. A preliminary  
146 evaluation of the psychometric equivalence between the two versions of the 22-item NAQ-R

147 was conducted. However, response bias and test-taking strategies were not measured. It is  
148 possible to consider both versions to be approximately psychometrically equivalent. The  
149 Cronbach's alpha for the pencil-and-paper version was .90, and for the online version, it was  
150 .93. Both versions showed comparable correlation values between NAQ-R and a single-item  
151 measure of WB ( $r = .68$  vs.  $.61$ ,  $z = 1.49$ ,  $p = .068$ ).

152 Demographics were obtained across these instances, forming the basis for the overall  
153 sample description. Participants, aged 17–75 ( $M = 39.0$ ,  $SD = 11.4$ ), constituted 66% women.  
154 Education levels varied: 34% completed upper secondary education, 22% had < 3 years of  
155 higher education, and 44% had  $\geq 3$  years. The majority (63%) were married or cohabiting,  
156 with professional experience spanning from 0.1 to 41 years ( $M = 7.1$ ,  $SD = 7.0$ ). They  
157 typically worked in groups ranging from 1 to 50 members ( $M = 16$ ,  $SD = 10$ ). Most (74.5%)  
158 worked full-time.

## 159 **Ethical statement**

160 The study was conducted in accordance with the Swedish Ethical Review Act (SFS  
161 2003:460). Prior to commencing data sampling in 2015, this study underwent consultation  
162 with a scientific secretary at the former Regional Ethical Board, now known as the Swedish  
163 Ethical Review Authority. Formal approval by the Ethical Review Authority was not required  
164 for this study, as it focuses solely on psychometric analysis of an anonymous questionnaire,  
165 without involving experiments or sensitive data usage. All protocols for methods and analyses  
166 were in line with Lund University's internal ethical guidelines. Data collection did not involve  
167 manipulation or deception tactics, and was conducted voluntarily. It involved anonymous  
168 standardized questionnaires, ensuring participant confidentiality and adherence to ethical  
169 standards. Written consent was obtained following the Declaration of Helsinki.

## 170 **Measures of workplace bullying**

### 171 **Negative Act Questionnaire-Revised (NAQ-R)**

172 To examine WB experiences over the past six months, this study utilized the NAQ-R  
173 [11], which was translated from Norwegian to Swedish, adapted, and published online by  
174 Dåderman and Ragnestål-Impola [18]. The NAQ-R consists of two distinct parts: the first  
175 includes 22 items, while the second comprises a single-item measure of WB (Item 23). The  
176 second part provides a definition of WB and asks about the respondent's subjective experience  
177 of being bullied.

178 The first part involves objectively worded items probing experiences of negative acts at  
179 work across three different situation-related negative forms of behaviors: work-related (seven  
180 items, e.g. “Having your opinions ignored”), person-related (12 items, e.g. “Being ignored or  
181 facing a hostile reaction when you approach”), and physically intimidating (three items, e.g.,  
182 “Intimidating behaviors such as finger pointing, invasion of personal space, showing,  
183 blocking your way”). The items are framed in behavioral language without explicitly  
184 mentioning the term “bullying.” The Swedish version by Dåderman and Ragnestål-Impola  
185 [18] deviates slightly from the original Norwegian version by Einarsen et al. [11]. For  
186 instance, the NAQ-R’s response format uses a Likert-like frequency-based scale (1 = “never”,  
187 2 = “now and then”, 3 = “monthly”, 4 = “weekly”, and 5 = “daily”). Caponecchia and Costa  
188 [19] criticized this format for its inconsistent intervals and the ambiguity of the “now and  
189 then” option. In the adapted Swedish version published by Dåderman and Ragnestål-Impola  
190 in 2019, the response option “now and then” was replaced with “sometimes” to alleviate  
191 interpretational ambiguity, addressing the critique that “now and then” could be misconstrued  
192 due to its placement between “never” and “monthly.” This change holds significance as it  
193 transitions the response format into a Likert-like ordered scale, rendering it more suitable for  
194 analysis not only through IRT but also via metric models like factor analyses [20].  
195 Furthermore, in the adaptation by Dåderman and Ragnestål-Impola, Item 6 (“Exclusion from  
196 the social community”) omitted the idiom “sent to Coventry” as it was criticized by Fevre at



197 al. [21] for its lack of universality. Fevre et al. also criticized Items 18 and 20 for including the  
198 term “excessive,” which can be widely interpreted. In the adaptation by Dåderman and  
199 Ragnestål-Impola, this term was revised to “unreasonable”.

200 Research on the NAQ-R’s factor structure reveals varied outcomes, with a prevalent  
201 single-factor model indicating WB. Some suggest two or three factors [11], representing  
202 distinct forms of WB, but these factors have very high latent intercorrelations (person-related  
203 with work-related  $r = .96$  and with physically intimidating bullying  $r = .89$ ). Replication  
204 across diverse samples has been inconsistent. Most studies treat WB as a unidimensional  
205 construct [22,23] to capture the broader WB experience, a perspective also adopted in the  
206 current study.

### 207 **Single-item measure of workplace bullying**

208 The second part of the NAQ-R, titled “About bullying,” consists solely of a single-item  
209 measure of WB (Item 23), which aligns with Einarsen et al.’s [11] definition of WB. This  
210 single-item measure asks respondents, “Have you been bullied at your workplace?” The  
211 provided definition of bullying encompasses repeated exposure to unpleasant, degrading, or  
212 peculiar treatment at work, lasting for a certain period and causing difficulties in self-defense.  
213 Response options range from 1 (“no”) to 5 (“yes, daily”). This single-item measure of WB is  
214 designed to assess the respondent’s personal experience of WB. In this study, it was used to  
215 assess concurrent validity of the new 13-item NAQ-R-SF developed in the current research.

### 216 **Short Negative Act Questionnaire (S-NAQ)**

217 The 9-item S-NAQ was derived from the 22-item NAQ-R through CTT, discussions at  
218 two International Association of Workplace Harassment and Bullying conferences, and  
219 validation using latent class analysis. Unlike IRT, which is specifically designed for  
220 shortening assessment tools, the S-NAQ was not reduced using such techniques. Our study  
221 applied IRT to evaluate the S-NAQ.

## 222 **Measures used to confirm validity of the NAQ-R-SF**

223 We included measures to confirm the convergent and divergent validity of the new NAQ-  
224 R-SF. These measures are short versions of Swedish adaptations of key constructs identified  
225 in WB meta-analytic research. These constructs encompass individual differences in  
226 experiencing WB, such as health quality and personality traits, as well as variations in  
227 workplace functioning, including interpersonal conflicts and work performance.

### 228 **EuroQol Five-Dimension Questionnaire (EQ-5D-3L)**

229 Given the extensive empirical research highlighting relationships between WB and  
230 employee health-related well-being [4,6-8], we included the EuroQol Five-Dimension  
231 Questionnaire (EQ-5D-3L) [24], a generic health-related quality of life instrument. Over a  
232 third of the participants (37%;  $n = 324$ ) completed its officially translated Swedish version  
233 ([EQ-5D-3L | EuroQol](#)).

234 The EQ-5D-3L has two parts. The first is a 5-item questionnaire assessing health-related  
235 quality of life across five dimensions: mobility, self-care, usual activities, pain/discomfort,  
236 and anxiety/depression, with responses from “no difficulties” to “extreme difficulties.” Scores  
237 form a five-digit health profile, convertible into a utility index using Swedish data [25]. The  
238 second part, the EQ-VAS, is a vertical scale where respondents rate their overall health  
239 quality from 0 (worst) to 100 (best). Both parts were used in this study.

### 240 **Mini International Personality Item Pool-6 Inventory (Mini IPIP6)**

241 The individual disposition hypothesis suggests that certain personality traits, such as  
242 neuroticism, may predispose an employee to experience WB [10]. Neuroticism is both a well-  
243 established antecedent and consequence of WB. A meta-analysis by Nielsen et al. [9] on  
244 workplace harassment, a broader concept than WB, found harassment positively associated  
245 with neuroticism ( $r = .25$ ) and negatively associated with extraversion ( $r = -.10$ ),  
246 agreeableness ( $r = -.17$ ), and conscientiousness ( $r = -.10$ ), with no significant relationship to

247 openness ( $r = .04$ ). However, more recent research [18,23] indicates that openness is also  
248 negatively correlated with WB. Openness may serve as a moderator in the relationships  
249 between WB and health-related quality of life [26]. In this study, most participants (88%,  $n =$   
250 767) completed the Mini-IPIP6 [27].

251 The Mini-IPIP6 is a 24-item personality assessment tool, evaluating six traits:  
252 extraversion, agreeableness, conscientiousness, neuroticism, openness, and honesty-humility,  
253 with 4 items dedicated to each trait. It uses responses ranging from 1 = “strongly disagree” to  
254 7 = “strongly agree”. The Swedish version (translated and adapted by Backström, Dåderman,  
255 Grankvist, Kajonius, and Lundin) is published online [18]. Extraversion involves energy,  
256 sociability, talkativeness, and assertiveness. Agreeableness includes kindness, helpfulness,  
257 and cooperation. Conscientiousness covers organization, reliability, and goal-orientation.  
258 Neuroticism indicates worry and anxiety. Openness reflects imagination and curiosity.  
259 Honesty-humility represents fairness and genuine behavior, even when exploitation is  
260 possible [28]. In this study, Cronbach’s alphas ( $\alpha$ ) and mean inter-item correlations ( $M_{iic}$ )  
261 were: extraversion (.79/.36), agreeableness (.75/.43), conscientiousness (.76/.44), neuroticism  
262 (.69/.26), openness (.63/.32), and honesty-humility (.67/.38).

### 263 **Interpersonal Conflict at Work Scale (ICAWS)**

264 WB can sometimes be referred to as coworker conflict. Spector and Jex [29] describe  
265 workplace interpersonal conflicts as ranging from minor disagreements to physical abuse,  
266 distinguishing between open conflicts (e.g., rudeness) and covert conflicts (e.g., rumor-  
267 spreading). Their findings indicate that such conflicts can disrupt workflow, hinder task  
268 cooperation, and lead to role conflicts, intentions to resign, as well as anxiety and depression.  
269 Employees who experience WB often report anxiety, depression, intentions to leave the  
270 workplace, and role conflicts. In this study, over a quarter of participants (27%;  $n = 231$ )  
271 completed the ICAWS [29] ( $\alpha = .80$ ,  $M_{iic} = .49$ ).

272 ICAWS is a 4-item measure of the frequency of conflict behaviors at work over the past  
273 month on a 5-point Likert-type scale (1 = “never”, 5 = “very often”). The Swedish version  
274 was translated by Granqvist and back-translated by Lundin. Its validity was confirmed  
275 through strong correlations with work-family conflict in workplace settings [30].

## 276 **Individual Work Performance Questionnaire (IWPQ)**

277 Strong meta-analytic evidence shows that employees who experience WB report high  
278 levels of mental distress and lower well-being [8], and they also score low on their work  
279 performance [7,30]. Research by Devonish [31] revealed that WB was negatively associated  
280 with task performance ( $r = -.30$ ) and interpersonal organizational citizenship behavior ( $r = -$   
281  $.29$ ) and positively associated with interpersonal counterproductive work behavior (CWB;  $r = -$   
282  $.43$ ). About a quarter of the participants (24.5%;  $n = 212$ ) completed the IWPQ [32],  
283 measuring task performance ( $\alpha = .68$ ,  $M_{iic} = .30$ ), contextual performance or organizational  
284 citizenship behavior ( $\alpha = .83$ ,  $M_{iic} = .39$ ), and CWB ( $\alpha = .77$ ,  $M_{iic} = .39$ ).

285 IWPQ is an 18-item measure of individual work performance using responses ranging 1–  
286 5, from “seldom” to “always” for task and contextual performance, and from “never” to  
287 “often” for CWB. All items have a recall period of 3 months. The Swedish version of the  
288 IWPQ has been published and validated [33,34]. Task performance involves meeting job  
289 expectations in quantity, quality, essential skills, and professional knowledge, including  
290 planning, problem-solving, accuracy, knowledge maintenance, goal setting, and timely goal  
291 achievement. Contextual performance extends beyond duties, involving extra tasks, project  
292 initiation, collaboration, offering advice, and enthusiasm. Conversely, CWB harm the  
293 organization, including complaints, negativity, off-task behavior, presenteeism, intentional  
294 mistakes, misuse of privileges, and exaggerating challenges.

295

296

## 297 **Preliminary tests evaluating IRT assumptions**

298 The IRT analysis utilized 2PLM IRT for Patient-Reported Outcomes (IRTPRO), and in  
299 accordance with the NAQ-R's five Likert-like response categories (1-5), a graded response  
300 model (GRM) [35] was selected. Prior to IRT, three key assumptions were scrutinized:  
301 approximately unidimensionality, monotonicity, and item independence.

302 The concept of approximate unidimensionality suggests that a test or set of items  
303 measures a single underlying latent trait, although strict adherence to this assumption is not  
304 always necessary. Reckase [36] demonstrated that one dominant factor significantly  
305 influencing item responses is often adequate for analysis. In simpler terms, the test should  
306 evaluate one central construct rather than multiple unrelated ones. This is evaluated by using  
307 exploratory factor analysis (EFA). Commonly used indicators supporting approximate  
308 unidimensionality include: (a) the first factor explaining at least 20% of the variance [36]; or  
309 (b) a ratio greater than 3 between the eigenvalues of the first and second factors [37].

310 IRTPRO does not feature a specific test for evaluating monotonicity directly. However,  
311 potential violations can be indirectly evaluated by examining item response functions. In our  
312 study, we applied the Mokken scale analysis [38] in R package mokken (version 3.1.0), which  
313 provides a detailed breakdown of individual items and their contribution to the scale's  
314 measurement quality, specifically in terms of the monotonicity assumption in IRT. For  
315 example, the Mokken scalability coefficient (H-coefficient) gauges the extent to which each  
316 item adheres to the monotonicity principle. Higher values of this coefficient indicate stronger  
317 evidence supporting monotonicity for that particular item. According to Van der Ark [38], a  
318 coefficient greater than .30 is indicative of satisfactory adherence to monotonicity.  
319 Understanding the contribution of each item to the overall functioning of the scale is what  
320 renders Mokken analysis invaluable for scale development and refinement.

321 IRTPRO software offers functionalities to evaluate local dependence (LD) [39]. LD can  
322 occur, for example, when the wording of two or more items is similar or uses synonyms,  
323 making it difficult for participants to distinguish between the items. As a result, they may  
324 select the same response category for all items. The evaluation of LD involves examining  
325 marginal fit ( $X^2$ ) and standardized LD  $X^2$  statistics, also known as the Chen and Thissen LD  
326  $X^2$  statistics. This statistic quantifies the level of dependence between two items by computing  
327 the squared difference between their observed and expected covariances, then dividing by the  
328 expected variance of the covariances assuming independence. Values that are high (e.g.,  
329 exceeding 10) indicate a significant level of dependence, indicating that the items may be  
330 measuring distinct constructs or inappropriately influencing each other. While standardized  
331 LD  $X^2$  aids in identifying potential dependencies, it is essential to complement it with other  
332 methods and expert judgment to draw informed conclusions. This may entail scrutinizing the  
333 content of the items. We examined both the content and factor loadings of pairs of items  
334 exhibiting LD to identify strong candidates for removal from the NAQ-R.

## 335 **Data management, analyses and modelling**

336 Prior to aggregation, data were meticulously cleaned. Some IRT models can partially  
337 handle missing data by estimating item parameter levels from observed data, accommodating  
338 missing responses for individuals or items. We have chosen to pursue our objectives with a  
339 complete dataset for thoroughness, and applied a straightforward approach for handling  
340 missing data (< 1%): mean item imputation, rounded to the nearest whole values.

341 When a scale has fewer than eight response options, Cronbach's alpha may be  
342 inappropriate for measuring reliability. Therefore, we calculated the mean inter-item  
343 correlation, ideally between .20 and .40. Additionally, to compare the correlation coefficients,  
344 we used the [Online-Calculator for testing correlations: Psychometrica](#). These correlations

345 were derived from the same sample, leveraging this dependence to increase the power of the  
346 significance test.

347 Like other measures assessing traits such as psychopathy, psychiatric disorders, and  
348 socially negative behaviors prevalent in only a small percentage of the general population, we  
349 anticipated skewness in the NAQ-R. Given our sizable sample size, we did not anticipate  
350 skewness to compromise our analyses. Based on the central limit theorem, it is observed that  
351 when large samples are drawn from skewed populations, the resulting means tend to conform  
352 to a normal distribution [20]. However, compromising and acknowledging lower power of  
353 nonparametric tests we opted for Spearman's coefficient over Pearson's coefficient when  
354 evaluating the concurrent validity.

355 Initially, we estimated an IRT model-data fit at both item and model levels using 22 items  
356 with IRTPRO. Then, we estimated IRT model-data fit for both short versions of the NAQ-R.  
357 We evaluated the absolute fit of the model to each item, using a generalization of Orlando and  
358 Thissen's [40]  $S-\chi^2$  item-fit statistics for polytomous data. Item-fit statistics were evaluated at  
359 1% significance level, as recommended by Stone and Zhang [41]. Model-data fit was  
360 evaluated by  $\chi^2_{\text{Loglikelihood}}$ , limited information goodness-of-fit statistic correcting for sparse  
361 information in one and two-way marginal tables ( $M^2$ ) [42] and its associated  $p$  value, root  
362 mean square error of approximation (RMSEA) [43], and error prediction estimates via Akaike  
363 information criterion (AIC) [44] and Bayesian information criterion (BIC) [45].

364 Toland [46] detailed the steps for conducting IRT analyses and explained the  
365 interpretation of  $S-\chi^2$  item-fit statistics and  $M^2$  limited information goodness-of-fit statistic as  
366 provided in IRTPRO. Briefly, like other goodness-of-fit statistics,  $M^2$  assumes perfect model-  
367 data fit in the population. Due to its sensitivity to minor model-data misfits, a nonsignificant  
368  $p$ -value is not expected. Smaller  $M^2$  values indicate better fit. RMSEA is defined similarly to  
369 its use in CTT [47].



370 Subsequently, discrimination (*a*) and location (*b*) item parameters were examined,  
371 guiding the selection of the most informative items to compose the new NAQ-R-SF.

372 DIF statistics using Wald tests [48] identifies non-invariance ( $p < .05$ ), anchoring  
373 invariant items while evaluating non-invariant ones. These analyses were conducted for the  
374 22-item NAQ-R and for both 9-item S-NAQ and 13-item NAQ-R-SF measures. We applied  
375 the Bonferroni correction to adjust for multiple testing to control Type I errors in our results.

376 To further validate our results and enable comparison with other researchers—specifically  
377 those who have treated the NAQ-R as a continuous unidimensional total scale score—we  
378 applied three single-factor CFA models. These models were applied to the 22-item NAQ-R,  
379 the 9-item S-NAQ, and the 13-item NAQ-R-SF. These analyses, conducted using AMOS  
380 software with the maximum likelihood estimation method, aimed to verify the approximate  
381 similarity between the three versions of the NAQ-R. We allowed to correlate residuals based  
382 on modification indices and substantive analysis of the items. All versions represent the same  
383 underlying data and use the same response format.

384 To assess the concurrent validity, the NAQ-R-SF was correlated with the single-item WB  
385 measure, NAQ-R, and S-NAQ. To examine the convergent and divergent validity of the  
386 NAQ-R-SF we evaluated key constructs identified in WB meta-analytic research. Individual  
387 differences in experiencing WB, such as health quality and personality traits, were examined  
388 by correlating the NAQ-R-SF with the EQ-5D-3L, and the six personality traits from the  
389 MiniIPIP-6. Variations in workplace functioning, such as interpersonal conflicts and work  
390 performance, were examined by correlating the NAQ-R-SF with the ICAWS, and the three  
391 types of individual work performance from the IWPQ.

## 392 **Item response theory model**

393 The GRM [35] was applied, encompassing discrimination (*a*) and location (*b*) parameters  
394 within the IRT analysis. Item quality was evaluated through the discrimination and location



395 parameters estimated for each item. Item Characteristic Curves (ICCs) depicted the  
396 connection between an individual's position on the latent trait (in this case, WB) and their  
397 likelihood of responding to an item designed for WB. Furthermore, item quality was  
398 evaluated based on the ICCs, which could be transformed into item information—a higher  
399 information value  $a$  indicating superior item quality. Aggregating information across all items  
400 yielded the test information, serving as an index for evaluating test precision. IRT offers a  
401 unique advantage in that it allows for the computation of two types of reliability: Conditional  
402 reliability, which accounts for potential variations in reliability across different levels of the  
403 latent variable, and marginal reliability coefficients, akin to overall reliability measures found  
404 in CTT frameworks such as Cronbach's alpha.

## 405 **Construction and psychometric evaluation of the NAQ-R-SF**

406 The new 13-item NAQ-R-SF was developed by removing from the NAQ-R items  
407 exhibiting relatively inferior item parameters compared to others. Evaluation of the  
408 psychometric properties of the short form (NAQ-R-SF) encompassed various analyses:  
409 unidimensionality testing, model-data fit analysis of the IRT model, evaluation of local  
410 independence, estimation of item parameters  $a$  and  $b$  and factor loadings  $\lambda$ , internal  
411 consistency and marginal reliability examination, evaluation of test information, and validity.

412 We exclusively provide illustrative data for the NAQ-R, as both abbreviated versions are  
413 derived from this comprehensive measure, incorporating subsets of its items. Item  
414 Information Functions (IIF; dashed lines) indicate how much empirical information  
415 (precision) each item contributes to the entire measure and where along the continuum this  
416 information is provided. The Test Information Function (TIF) represents the sum of the areas  
417 under each IIF, reflecting both the unique amount of information each item provides and the  
418 total number of items.

419

## 420 Results

### 421 Preliminary analyses: evaluating IRT assumptions

422 We first evaluated the assumption of approximate unidimensionality. The first eigenvalue  
423 (9.4) substantially exceeded the second (1.7), with a ratio ( $> 4$ ) favoring unidimensionality.  
424 Moreover, the first factor explained 43% of total variance, significantly more than the second  
425 (8%), further supporting approximate unidimensionality.

426 The Mokken analysis, used to evaluate monotonicity, revealed that only Item 22 had a  
427 low scalability H-coefficient of 0.25, with no other identified violations. Item 3 (“Being  
428 ordered to do work below your level of competence”) displayed a H-coefficient of 0.32,  
429 exhibiting the highest values among all items for various metrics including the total number  
430 of active pairs ( $\#ac = 112$ ), total number of violations ( $\#vi = 8$ ), average number of violations  
431 per active pair ( $\#vi/\#ac = 0.07$ ), maximum violation ( $maxvi = 0.07$ ), sum of all violations ( $sum$   
432  $= 0.41$ ), average violation per active pair ( $sum/\#ac = 0.0037$ ), and maximum test statistics  
433 ( $zmax = 1.99$ ). Given these findings, especially the significant violation observed, Item 3  
434 appears to be a strong candidate for removal from the item set of NAQ-R due to concerns  
435 regarding monotonicity (Fig. 1).

436 **Fig 1. Visualizing a Violated Response Step Function in Item 3.** Item 3 of the NAQ-R:  
437 “Being ordered to do work below your level of competence”. The horizontal axis depicts the  
438 latent trait (in this case, workplace bullying) of the 867 respondents of the NAQ-R, ranging  
439 from low to high values. The vertical axis represents the probability of endorsing each step of  
440 Item 3, ranging from 0 (never endorsing) to 1 (always endorsing). Each line corresponds to a  
441 step within the polytomous Item 3. The shaded area indicates the confidence interval around  
442 the estimated functions. While the lines typically show increasing functions of the latent trait,  
443 Item 3 notably violates the assumption of monotonicity.

444 Finally, we evaluated the assumption of item independence. Several LD  $X^2$  statistics  
445 surpassed 10, suggesting potential LD. Specifically, the following item pairs displayed LD:  
446 Item 3 (see above) and Item 17 (“Having allegations made against you”); Item 22 (“Threats of  
447 violence or physical abuse”) and Item 9 (“Intimidating behaviors like finger-pointing,  
448 invasion of personal space”); and Item 21 (“Exposure to an unmanageable workload”) and  
449 Item 16 (“Tasks with unreasonable deadlines”). Notably, the latter pair demonstrated the  
450 highest LD  $X^2$  value of 44.4, while the others were under 15. After analyzing content of the  
451 pairs of items exhibiting potential LD, we decided that items showing lowest  $\lambda$  in each pair  
452 would be good candidates to be removed from the item set of the NAQ-R. The items were:  
453 Item 3, 22 and 16.

## 454 **IRT analyses**

455 Table 1 presents IRT model-data fit results, including item parameters ( $a$  and  $b$ ), factor  
456 loadings, and fit statistics for the 22-item NAQ-R, 9-item S-NAQ, and 13-item NAQ-R-SF  
457 derived in this study. Variations in discrimination, location, and reliability among NAQ-R  
458 items were identified through IRT analyses. Table 1 shows that the  $S-\chi^2$  item-fit statistics for  
459 the NAQ-R indicated a satisfactory fit on the item level, with only 4 out of 22 items not well  
460 represented by the estimated item parameters. Items 3 and 4 are no longer part of the short  
461 versions, S-NAQ and NAQ-R-SF. The remaining items with poor  $S-\chi^2$  item-fit statistics in  
462 the NAQ-R showed satisfactory fit in these short versions. Item-level fit results indicated that  
463 items in these short versions had adequate fit, except for Items 2 and 5.

464 As expected, most model level fit statistics did not fit the data exactly, because they  
465 assume perfect model-data fit in the population. However, the RMSEA indicated similar and  
466 adequate model-fit for the three versions of the NAQ-R; it was better for the short versions.

467

468

**Table 1. Factor loadings, item parameters, and model-data fit statistics of the NAQ-R, S-NAQ, and the NAQ-R-SF**

| Item                      | $\lambda$<br>22-<br>item<br>NAQ-<br>R | $\lambda$<br>9-item<br>S-<br>NAQ | $\lambda$<br>13-<br>item<br>NAQ-<br>R-SF | Item parameters 22-item NAQ-R |           |       |       |       | Item level fit      |       | Item parameters 9-item S-NAQ |           |       |                         |       | Item level fit |      | Item parameters 13-item NAQ-R-SF |       |       |       |       | Item level fit |      |
|---------------------------|---------------------------------------|----------------------------------|------------------------------------------|-------------------------------|-----------|-------|-------|-------|---------------------|-------|------------------------------|-----------|-------|-------------------------|-------|----------------|------|----------------------------------|-------|-------|-------|-------|----------------|------|
|                           |                                       |                                  |                                          | $a$                           | $b_1$     | $b_2$ | $b_3$ | $b_4$ | $S-\chi^2$          | $p$   | $a$                          | $b_1$     | $b_2$ | $b_3$                   | $b_4$ | $S-\chi^2$     | $p$  | $a$                              | $b_1$ | $b_2$ | $b_3$ | $b_4$ | $S-\chi^2$     | $p$  |
| 1                         | .61                                   | .57                              | -                                        | 1.32                          | -<br>0.09 | 1.47  | 2.70  | 3.76  | 123.76              | .054  | 1.19                         | -<br>0.11 | 1.57  | 2.93                    | 4.10  | 70.16          | .197 | -                                | -     | -     | -     | -     |                |      |
| 2                         | .80                                   | -                                | .78                                      | 2.24                          | 0.30      | 1.43  | 2.28  | 3.18  | 89.18               | .250  | -                            | -         | -     | -                       | -     |                |      | 2.12                             | 0.30  | 1.47  | 2.37  | 3.33  | 91.53          | .004 |
| 3                         | .51                                   | -                                | -                                        | 1.00                          | -<br>0.64 | 1.04  | 2.07  | 3.12  | 201.22              | <.001 | -                            | -         | -     | -                       | -     |                |      | -                                | -     | -     | -     | -     |                |      |
| 4                         | .68                                   | -                                | -                                        | 1.57                          | 0.43      | 1.72  | 2.61  | 3.81  | 145.98              | <.001 | -                            | -         | -     | -                       | -     |                |      | -                                | -     | -     | -     | -     |                |      |
| 5                         | .77                                   | .79                              | .78                                      | 2.04                          | 0.22      | 1.41  | 2.21  | 3.11  | 161.61              | <.001 | 2.22                         | 0.20      | 1.38  | 2.19                    | 3.11  | 83.13          | .005 | 2.15                             | 0.21  | 1.39  | 2.20  | 3.11  | 97.56          | .003 |
| 6                         | .80                                   | .83                              | .82                                      | 2.23                          | 0.61      | 1.74  | 2.46  | 3.25  | 126.33              | <.001 | 2.51                         | 0.56      | 1.70  | 2.42                    | 3.23  | 57.24          | .169 | 2.41                             | 0.58  | 1.72  | 2.44  | 3.22  | 59.94          | .209 |
| 7                         | .83                                   | .86                              | .85                                      | 2.57                          | 0.67      | 1.61  | 2.17  | 3.20  | 109.42              | .009  | 2.83                         | 0.63      | 1.59  | 2.17                    | 3.28  | 47.30          | .301 | 2.78                             | 0.65  | 1.60  | 2.17  | 3.22  | 67.05          | .109 |
| 8                         | .69                                   | .68                              | -                                        | 1.61                          | 0.44      | 1.79  | 2.63  | 4.33  | 119.22              | .021  | 1.56                         | 0.43      | 1.84  | 2.72                    | 4.53  | 63.70          | .252 | -                                | -     | -     | -     | -     |                |      |
| 9                         | .74                                   | -                                | .72                                      | 1.86                          | 1.60      | 2.42  | 3.03  | 3.54  | 86.55               | .014  | -                            | -         | -     | -                       | -     |                |      | 1.74                             | 1.67  | 2.53  | 3.19  | 3.74  | 70.77          | .023 |
| 10                        | .85                                   | -                                | .85                                      | 2.76                          | 1.07      | 1.95  | 2.43  | 3.10  | 83.17               | .021  | -                            | -         | -     | -                       | -     |                |      | 2.75                             | 1.07  | 1.99  | 2.51  | 3.21  | 58.28          | .171 |
| 11                        | .84                                   | .82                              | .83                                      | 2.61                          | 0.50      | 1.59  | 2.17  | 3.16  | 94.26               | .019  | 2.44                         | 0.49      | 1.64  | 2.28                    | 3.41  | 67.55          | .041 | 2.55                             | 0.49  | 1.62  | 2.24  | 3.29  | 58.04          | .363 |
| 12                        | .84                                   | .81                              | .83                                      | 2.63                          | 0.47      | 1.51  | 2.19  | 2.93  | 115.65              | .002  | 2.36                         | 0.47      | 1.57  | 2.34                    | 3.21  | 70.01          | .021 | 2.57                             | 0.46  | 1.54  | 2.26  | 3.06  | 66.91          | .095 |
| 13                        | .86                                   | .83                              | .85                                      | 2.87                          | 0.62      | 1.53  | 2.21  | 3.16  | 94.51               | .033  | 2.53                         | 0.62      | 1.61  | 2.38                    | 3.49  | 57.82          | .095 | 2.69                             | 0.62  | 1.58  | 2.31  | 3.34  | 69.87          | .033 |
| 14                        | .85                                   | -                                | .83                                      | 2.72                          | 0.06      | 1.32  | 2.06  | 2.75  | 100.61              | .043  | -                            | -         | -     | -                       | -     |                |      | 2.48                             | 0.04  | 1.37  | 2.16  | 2.93  | 67.28          | .143 |
| 15                        | .77                                   | .76                              | .78                                      | 2.03                          | 0.67      | 1.89  | 2.70  | 3.60  | 86.55               | .151  | 2.01                         | 0.65      | 1.93  | 2.77                    | 3.73  | 73.42          | .011 | 2.10                             | 0.65  | 1.89  | 2.71  | 3.62  | 68.29          | .064 |
| 16                        | .62                                   | -                                | -                                        | 1.36                          | -<br>0.14 | 0.94  | 1.78  | 2.81  | 160.30              | .005  | -                            | -         | -     | -                       | -     |                |      | -                                | -     | -     | -     | -     |                |      |
| 17                        | .84                                   | -                                | .81                                      | 2.59                          | 0.40      | 1.62  | 2.40  | 3.51  | 84.64               | .146  | -                            | -         | -     | -                       | -     |                |      | 2.32                             | 0.40  | 1.69  | 2.54  | 3.79  | 61.27          | .132 |
| 18                        | .74                                   | -                                | -                                        | 1.86                          | 0.42      | 1.64  | 2.29  | 2.95  | 95.27               | .305  | -                            | -         | -     | -                       | -     |                |      | -                                | -     | -     | -     | -     |                |      |
| 19                        | .71                                   | -                                | -                                        | 1.71                          | 0.72      | 1.77  | 2.50  | 4.06  | 126.09              | .007  | -                            | -         | -     | -                       | -     |                |      | -                                | -     | -     | -     | -     |                |      |
| 20                        | .75                                   | -                                | .75                                      | 1.90                          | 1.09      | 2.27  | 2.96  | 3.50  | 82.22               | .100  | -                            | -         | -     | -                       | -     |                |      | 1.92                             | 1.08  | 2.30  | 3.01  | 3.56  | 79.90          | .006 |
| 21                        | .66                                   | -                                | -                                        | 1.49                          | -<br>0.15 | 0.88  | 1.62  | 2.69  | 161.50              | .007  | -                            | -         | -     | -                       | -     |                |      | -                                | -     | -     | -     | -     |                |      |
| 22                        | .53                                   | -                                | -                                        | 1.07                          | 2.40      | 3.40  | 4.58  | 5.54  | 68.97               | .114  | -                            | -         | -     | -                       | -     |                |      | -                                | -     | -     | -     | -     |                |      |
| IRT model level fit       |                                       |                                  |                                          |                               |           |       |       |       |                     |       |                              |           |       |                         |       |                |      |                                  |       |       |       |       |                |      |
| $\chi^2_{2Loglikelihood}$ |                                       |                                  |                                          | 29,351.64                     |           |       |       |       | 12,146.64           |       |                              |           |       | 14,967.75               |       |                |      |                                  |       |       |       |       |                |      |
| AIC                       |                                       |                                  |                                          | 29,571.64                     |           |       |       |       | 12,236.64           |       |                              |           |       | 15,097.75               |       |                |      |                                  |       |       |       |       |                |      |
| BIC                       |                                       |                                  |                                          | 30,095.79                     |           |       |       |       | 12,236.06           |       |                              |           |       | 15,097.75               |       |                |      |                                  |       |       |       |       |                |      |
| $M^2(df), p$              |                                       |                                  |                                          | 768.68 (143), .0001           |           |       |       |       | 905.51 (567), .0001 |       |                              |           |       | 2,057.13 (1,235), .0001 |       |                |      |                                  |       |       |       |       |                |      |
| RMSEA                     |                                       |                                  |                                          | 0.07                          |           |       |       |       | 0.03                |       |                              |           |       | 0.03                    |       |                |      |                                  |       |       |       |       |                |      |

470 Note.  $N = 867$ . NAQ-R = Negative Acts Questionnaire-Revised; items 1, 3, 14, 16, 18, 19, 21 reflect content of work-related bullying, while 2, 4, 5, 6, 7, 10, 11, 12, 13, 15,  
471 17, 20 person-related bullying, and 8, 9, 22 physically intimidating bullying. S-NAQ = Short Negative Act Questionnaire. NAQ-R-SF = Negative Acts Questionnaire-  
472 Revised-Short Form (developed in this study).  $\lambda$  = standardized factor loading,  $a$  = discrimination parameter (discriminative effect: Moderate = 0.65–1.34, High = 1.35–1.68,  
473 Very high  $\geq 1.69$ ).  $b_1$ – $b_4$  = item location parameters.  $S-\chi^2$  = item-fit statistics.  $p$  =  $p$  value associated with item-fit statistics.  $\chi^2_{2Loglikelihood}$  = a likelihood ratio test. AIC = Akaike  
474 information criterion. BIC = Bayesian information criterion.  $M^2(df), p$  = limited information goodness-of-fit statistic and its associated  $p$  value. RMSEA = root mean square  
475 error of approximation. All results were performed in IRTPRO 5.20. IRT analyses were conducted separately for the respective NAQ version.

476 The results shown in Table 1 indicate that the 13-item NAQ-R-SF comprises items with  
477 exceptionally high discriminatory power, representing the most informative items regarding  
478 parameters  $a$  and  $b$ .

479 In our comparative analysis utilizing IRT, we evaluated the 9-item version S-NAQ. Our  
480 investigation reveals that two of the nine items, specifically Item 1 (related to work-related  
481 bullying) and Item 8 (related to physically intimidating bullying), exhibit inefficacy in  
482 comparison to the other items in this version, as well as in contrast to both the 22-item NAQ-  
483 R and the 13-item NAQ-R-SF. These items displayed lower discriminative effect ( $a = 1.19$   
484 and  $1.56$ , respectively), and lower factor loadings ( $\lambda = .57$  and  $.68$ , respectively).

485 While  $a$  and  $b$  parameters provide valuable insights, they should not be the sole criteria  
486 for evaluating item quality. Item 19 (“Pressure not to claim something to which you are  
487 entitled by right, e.g., sick leave, holiday entitlement, travel expenses”) demonstrated  
488 favorable  $a$  and  $b$  parameters; nevertheless, we conducted a content evaluation of all items.  
489 We opted to exclude Item 19 due to robust legal protections against such practices in Sweden.

490 Table 1 indicates consistent quantity and ratio of items addressing work-related and  
491 physically intimidating bullying in both abbreviated versions. Each content type is  
492 represented by one item, chosen more aptly through IRT compared to traditional methods.  
493 The condensation resulted in a 64% reduction in work-related bullying items and an 86%  
494 reduction in physically intimidating bullying compared to the 22-item NAQ-R.

495 IRT results for the 22-item NAQ-R are visually depicted in Figs 2 and 3. We analyzed the  
496 item properties, including the amount of psychometric information (precision) available for  
497 each NAQ-R item or subset of items (Fig 2), and for the entire measure (Fig 3).

498 **Fig 2. Item characteristics curves (ICC; colored lines) combined with item information**  
499 **functions (IIF; dashed lines) for each of the 22-items comprising NAQ-R ( $N = 867$ ).**

500 Labeling the sample as “Group 1” indicates that it has not been visualized with regard to

501 subgroups, such as men and women. Each figure contains colored and dashed lines  
502 corresponding to different items in the NAQ-R. These lines, representing Item Characteristic  
503 Curves (ICCs) in color and Item Information Functions (IIFs) in dashed lines, offer graphical  
504 representations used to analyze item behavior in IRT models. Colored lines indicate how the  
505 probability of the respective response changes across the WB range, while dashed lines  
506 illustrate the amount of information the item contributes to estimating the WB level of all  
507 responders with varying WB levels. By examining both ICCs and IIFs simultaneously,  
508 valuable insights can be gained into each item's characteristics, including item location (also  
509 known as "difficulty" or "threshold"), discrimination, and information. (See Fig. 1 for the  
510 description of horizontal and vertical axes.)

511 **Fig 3. Test information function (TIF) of the Workplace Bullying by 22-item NAQ-R**  
512 **under the graded response model ( $N = 867$ ) showing marginal reliability.** The horizontal  
513 axis illustrates the latent trait  $\theta$  of workplace bullying (WB), while the vertical axis represents  
514 the amount of information and the standard error provided by the NAQ-R across various  
515 levels of WB. Ranging from about 0.5 SDs above the mean to above 3.00 SDs above the  
516 mean, the amount of test information was at least 24 (which yields a standard error of estimate  
517 about 0.8). Marginal reliability was equal to or greater than 0.96 within the range described.  
518 The reliability between about -0.5 SDs below the mean and above 3 SDs above the mean was  
519 .90.

520 Fig. 3 illustrates the test information function (TIF) represented by a solid line for the 22-  
521 item NAQ-R measure. The TIF indicates that the NAQ-R measure yields relatively consistent  
522 information, averaging around 24, within a range of approximately 0.5 standard *SDs* from the  
523 mean up to over 3 *SDs* above the mean. This range exhibits a marginal reliability of about .96  
524 and an expected standard error of estimate, represented by the dashed line in Fig. 3, of  
525 approximately 0.2 for scores within this interval. The marginal reliability for response pattern

526 scores, as provided by IRTPRO, was estimated at .89 for the entire continuum. For the  
527 abbreviated versions, the 13-item NAQ-R-SF exhibited a marginal reliability of .82, while the  
528 9-item S-NAQ had a marginal reliability of .79. These marginal reliability values are  
529 approximations spanning the entirety of the continuum.

## 530 **Is there differential item functioning observed between males and** 531 **females?**

532 We did not observe sex-related differences in the interpretation of the items. However, in  
533 the NAQ-R, Item 3 (“Being ordered to do work below your level of competence”) exhibited  
534 minor DIF with a lower discrimination parameter ( $a$ ) in males (0.68) compared to females  
535 (1.09), suggesting it is more indicative of WB in females. Notably, we have previously noted  
536 that Item 3 should be considered for removal from the NAQ-R item set due to its  
537 nonmonotonicity. Similarly, Item 9 (“Intimidating behaviors such as finger-pointing, invasion  
538 of personal space, shoving, blocking your way”) displayed minor DIF, with a distinct location  
539 parameter ( $b$ ) observed in males ( $p = .041$ ). In the NAQ-R-SF, Item 9 exhibited minor DIF,  
540 with a distinct location parameter ( $b$ ) observed in males ( $p = .048$ ). After correcting for  
541 multiple testing with Bonferroni adjustment, no significant sex-related DIF was observed in  
542 either the classical 22-item NAQ-R or the 13-item NAQ-R-SF developed in this study. No  
543 sex-related DIF was found in the S-NAQ.

## 544 **Additional comparative and correlational analyses**

### 545 **Confirmatory factor analyses of single factor models**

546 All free models for WB fitted well (Table 2). The 22-item NAQ-R model exhibited  
547 inferior fit indices compared to both the 9-item S-NAQ and the 13-item NAQ-R-SF models,  
548 thus affirming the structural validity of the abbreviated versions. The results underscore that  
549 both the 9-item S-NAQ and the 13-item NAQ-R-SF showed approximately similar fit

550 statistics, and better compared to the 22-item NAQ-R (however, see Table 1 for evidence that  
 551 two items in the S-NAQ were less informative, contrasting with the NAQ-R-SF, which  
 552 exclusively includes informative items).

553 **Table 2. CFA of single-factor models of the NAQ-R, S-NAQ, and the NAQ-R-SF.**

| Model                         | $\chi^2$ (df) | $\chi^2/df$ | CFI   | SRMR  | RMSEA (90% CI)    |
|-------------------------------|---------------|-------------|-------|-------|-------------------|
| 22-item NAQ-R <sup>a</sup>    | 1070.45 (205) | 5.22        | .91   | .052  | .070 (.066; .074) |
| 9-item S-NAQ                  | 95.98 (27)    | 3.56        | .98   | .025  | .054 (.043; .066) |
| 13-item NAQ-R-SF <sup>b</sup> | 188.55 (64)   | 4.01        | .97   | .030  | .059 (.052; .067) |
| Recommended cut-off point     |               | < 5.0       | > .95 | < .08 | < .08             |

554 *Note.*  $N = 867$ . NAQ-R = Negative Acts Questionnaire-Revised. S-NAQ = Short Negative Act Questionnaire.  
 555 NAQ-R-SF = Negative Acts Questionnaire-Revised-Short Form (developed in this study). <sup>a</sup>Allowed correlation  
 556 of errors stemmed from two primary sources: proximity of items location (items 3x4) and similarity of content  
 557 (items 16x21 “unmanageable workload” and “deadline”; items 9x22 “intimidating behavior” and “threats of  
 558 violence”, and 15x20 items “jokes” and “sarcasm”). <sup>b</sup>Error correlations between items 15x20.  $\chi^2 =$  Chi square;  $p$   
 559 of all values is  $< .001$ .  $\chi^2/df =$  minimum discrepancy divided by its degree of freedom CMIN/df. CFI =  
 560 confirmatory fit index. SRMR = standardized root mean square residual. RMSEA = root mean square error of  
 561 approximation. 90%CI = 90% confidence interval.

## 562 Concurrent validity

563 Table 3 presents the results of the concurrent validity test, including correlations of the  
 564 NAQ-R-SF with a single-item measure of WB, the NAQ-R, and the S-NAQ, alongside  
 565 descriptive statistics. The table indicates good concurrent validity and reliability for the NAQ-  
 566 R-SF when compared with established and validated measures. Statistical tests were  
 567 conducted to assess differences in correlation values among the measures ( $r = .53, .52, .57$ ),  
 568 with the nonsignificant result ( $z = .39, p = .349$ ) suggesting a strong level of agreement  
 569 between these concurrent measures of WB.

570 **Table 3. Spearman’s correlation analysis and descriptive statistics for study variables.**

| Variable                      | 1           | 2           | 3           | 4           | 5            |
|-------------------------------|-------------|-------------|-------------|-------------|--------------|
| 1. Single-item measure        | -           |             |             |             |              |
| 2. 22-item NAQ-R              | .53*        | -           |             |             |              |
| 3. 9-item S-NAQ               | .52*        | .90*        | -           |             |              |
| 4. 13-item NAQ-R-SF           | .57*        | .91*        | .94*        | -           |              |
| 5. Age                        | .10*        | -.06        | -.01        | -.01        |              |
| 6. Sex (Man = 1, Woman = 2)   | .03         | -.12*       | -.08        | -.07        | .10*         |
| <i>Descriptive statistics</i> |             |             |             |             |              |
| Min–max (raw score)           | 1–5         | 22–85       | 9–40        | 13–55       | 17–75        |
| Mean                          | 1.42        | 33.9        | 13.6        | 18.7        | 39.4         |
| Standard deviation            | 0.8         | 11.6        | 5.3         | 7.2         | 11.4         |
| Median                        | 1           | 31          | 12          | 16          | 38           |
| Skewness (standard error)     | 2.15 (0.08) | 1.57 (0.08) | 1.98 (0.08) | 2.09 (0.08) | 0.42 (0.08)  |
| Kurtosis (standard error)     | 5.12 (0.17) | 2.58 (0.17) | 4.44 (0.17) | 5.02 (0.17) | -0.77 (0.17) |
| Cronbach’s alpha              | -           | .93         | .89         | .93         | -            |

571 *Note.*  $N = 867$ . With Bonferroni adjustment for multiple testing, only correlations with  $p \leq .033$  reach  
 572 significance at  $p < .05$  ( $.05/15 = .033$ ).



## 573 **Divergent validity with individual differences in experiencing workplace** 574 **bullying**

575 After applying a Bonferroni-adjusted  $p$ -value for two comparisons ( $.05/2 = .025$ ), the  
576 NAQ-R-SF showed significant negative correlations with both the EQ-5D-3L Index ( $r = -.22$ )  
577 and the EQ-5D-3L VAS ( $r = -.22$ ). For six personality trait comparisons, a Bonferroni-  
578 adjusted  $p$ -value of  $.008$  ( $.05/6$ ) was used. The NAQ-R-SF demonstrated significant positive  
579 correlation with neuroticism ( $r = .27$ ) and significant negative correlations with extraversion  
580 ( $r = -.12$ ), agreeableness ( $r = -.13$ ), conscientiousness ( $r = -.14$ ), and honesty-humility ( $r = -$   
581  $.12$ ), but no significant correlation with openness ( $r = -.09$ ). These results support the  
582 divergent validity of the NAQ-R-SF.

## 583 **Convergent and divergent validity with variations in workplace functioning**

584 The NAQ-R-SF was significantly positively correlated with interpersonal conflicts at  
585 work ( $r = .55$ ) and counterproductive work behavior (CWB) ( $r = .29$ ). After applying a  
586 Bonferroni-adjusted  $p$ -value for three comparisons ( $.05/3 = .017$ ), it also showed significant  
587 negative correlations with task-related work performance ( $r = -.38$ ) and contextual-related  
588 work performance ( $r = -.18$ ). These findings provide strong evidence of convergent validity  
589 for the NAQ-R-SF ( $r > .50$  with interpersonal conflicts at work) and adequate divergent  
590 validity ( $r < .50$  with other measures of workplace functioning).

## 591 **Discussion**

592 The study is groundbreaking in its utilization of several applications of IRT, allowing for  
593 a comprehensive psychometric analysis of the 22-item and 9-item NAQ-R measures at both  
594 item and scale levels. Additionally, it facilitated the development of a concise 13-item WB  
595 measure (NAQ-R-SF), and investigated potential sex-related DIF. Applying classical CTT  
596 (CFA, correlations) we validated the NAQ-R-SF across a substantial and well-defined  
597 employee sample.

598 Our study extends the understanding of the NAQ-R through the application of IRT, an  
599 approach not widely explored in prior NAQ-R studies. For instance, Caponecchia and Costa  
600 [19] primarily utilized IRT for analyzing items in relation to the response format. Similarly,  
601 Ma et al. [49] applied IRT but focused on computerized adaptive testing among nurses in a  
602 specific cultural context, which makes direct comparisons challenging.

603 The development of a short version of an instrument requires that the theoretical rationale  
604 of the original instrument is well represented in the shortened version. We acknowledge that  
605 any short form should adhere to this theoretical rationale; otherwise, it cannot be considered a  
606 true short form of the NAQ-R as it would operationalize a different construct. In line with this  
607 view, both short versions (S-NAQ and NAQ-R-SF) include items reflecting the three forms of  
608 WB (work-related, person-related, and physically intimidating) described by Einarsen et al.  
609 [11], though these forms are represented by different items. (See Table 1 for a detailed  
610 breakdown of the items included in both the S-NAQ and NAQ-R-SF.) Through IRT analysis,  
611 it was revealed that the most informative items within the 9-item S-NAQ capture person-  
612 related WB. Notelaers et al. [12] aimed to develop a short measure encompassing different  
613 forms of WB. However, in the S-NAQ, only Item 1 (“Someone withholding information  
614 which affects your performance”) reflects work-related bullying, which was found not  
615 informative in our IRT analysis (see Table 1). Similarly, only Item 8 (“Being shouted at or  
616 being the target of spontaneous anger”) reflects physically intimidating bullying, and it was  
617 less informative in our IRT analysis. These two items showed lower factor loadings ( $< .70$ ),  
618 consistent with the argument by Notelaers et al. [12] that items reflecting physically  
619 intimidating bullying consistently exhibit lower factor loadings, suggesting physical  
620 aggression may not constitute WB. As a result of performed IRT analysis, we excluded two of  
621 the three items reflecting physically intimidating bullying from the NAQ-R-SF. We  
622 acknowledge that physical aggression encompasses various constructs, and its more severe

623 manifestations, as exemplified in item 22 (“Threats of violence or physical abuse or actual  
624 abuse”), are governed by distinct laws compared to WB. This particular item has been  
625 removed from the two abbreviated versions. However, Item 9 (“Intimidating behaviors such  
626 as finger-pointing, invasion of personal space, showing, blocking your way”) exhibited  
627 favorable IRT parameters, suggesting its inclusion in our condensed version, NAQ-R-SF. In  
628 conclusion, the item selection process for our developed short version of the NAQ-R, denoted  
629 NAQ-R-SF, utilized a method, IRT, specifically recommended for scale reduction. Although  
630 these two short versions of the NAQ-R were shortened by different methods, NAQ-R-SF  
631 maintains a comparable proportion of items to the S-NAQ, encompassing the majority of  
632 items related to person-related WB.

633 Despite employing distinct strategies for abbreviation, both versions serve as concise  
634 tools for evaluating WB, encapsulating the three forms of negative behaviors measured by the  
635 NAQ-R. However, only 2 out of 13 items (NAQ-R-SF) and 2 out of 9 items (S-NAQ) pertain  
636 to the other two forms of WB, thus, the work-related bullying dimension is minimally  
637 represented in both short scales. This may raise concerns that these short scales may not be  
638 true abbreviations of the NAQ-R, as the proportion of items representing the three forms and  
639 their contribution to the total score has changed. However, Notelaers et al. [12] cautioned  
640 bullying researchers to be mindful when differentiating between dimensions of WB. While  
641 various types of negative social behaviors exist, their findings indicated that this does not  
642 imply a clear distinction between different forms of bullying itself. Our analysis shows that  
643 both short scales are unidimensional and fit the data well. The possible labeling of these WB  
644 forms is misleading, as most items related to person-related WB focus on social isolation at  
645 the workplace (e.g., Item 6, “Being ignored or excluded” or Item 12, “Being ignored or facing  
646 a hostile reaction when you approach”), which remains highly relevant for employee  
647 satisfaction and performance. Notably, in the current study, the NAQ-R-SF showed

648 significant correlations with variables measuring person-related constructs, such as health  
649 quality and personality, as well as work-related constructs, such as interpersonal conflicts at  
650 work and work performance. This supports the idea that the NAQ-R-SF captures a broad  
651 range of WB behaviors.

652 In our study, after adjusting for multiple testing, we found that sex-related DIF was not  
653 significant. This finding aligns with prior research by Sischka et al. [17], suggesting that men  
654 and women interpret items related to experienced WB similarly.

655 In summary, we successfully validated the new NAQ-R-SF. The structural validity of the  
656 NAQ-R-SF demonstrated similar fit statistics compared to the S-NAQ and NAQ-R (see Table  
657 2). Like the NAQ-R and S-NAQ, the NAQ-R-SF includes items that reflect all three forms of  
658 workplace bullying and are similarly interpreted by men and women. It also exhibited  
659 appropriate concurrent, convergent and divergent validity, consistent with theoretical  
660 expectations and previous research [3,4,6-8,31], supporting the notion that personality is  
661 associated with WB [9,10,18,23,26].

## 662 **Limitations and future research**

663 The study's limitations echo common issues in psychological research, including the treat  
664 of Likert-like scale items as approximately continuous, self-report biases and constraints due  
665 to the study's cross-sectional design. Nonetheless, the study's strengths lie in the focused  
666 sample of employed persons, a sizable participant pool, and the utilization of IRT, ensuring a  
667 high degree of reliability.

668 NAQ-R data are based on a five-point Likert-like measure, which we treat as  
669 approximately continuous when performing statistical analyses such as CFA. Utilizing Likert-  
670 like data consistently supports treating these variables as approximately continuous in both  
671 applied and organizational psychology. While technically ordinal, Likert-like scales comprise  
672 ordered categories. However, it is worth noting that this approach has faced criticism. Liddell

673 and Kruschke [50] conducted an extensive survey of articles across prominent psychology  
674 journals, revealing that all studies examining ordinal data employed a metric model. However,  
675 this theoretical discrepancy is, according to Norman [20], irrelevant to the analysis since the  
676 computer lacks the capacity to confirm or deny it. Additionally, Robitzsch [51] emphasized  
677 the complexity of determining the appropriate modeling strategy for ordinal variables in  
678 factor analysis.

679 This study utilized a convenience sample for efficient data collection, but its  
680 generalizability may be restricted due to the non-random sampling approach. Future research  
681 should utilize probability sampling techniques to further validate and extend these findings.  
682 Despite challenges in designing ideal studies on WB, we condensed the NAQ-R to a 13-item  
683 measure using data from Swedish organizations sampled between 2015 and 2019,  
684 incorporating both paper-and-pencil and electronic methods, with a predominance of female  
685 participants. Similarly, Notelaers et al. [12] shortened the NAQ-R to a 9-item measure,  
686 sampling data from Belgian organizations between 2008 and 2016, incorporating both paper-  
687 and-pencil and electronic methods, with a predominance of male participants. NAQ-R-SF was  
688 constructed using Swedish data, potentially reflecting cultural influence. Despite its favorable  
689 IRT parameters, we opted to exclude Item 19. Notably, this item, as highlighted by Notelaers  
690 et al. [12], was discussed at international conferences but was not included in the 9-item  
691 version (S-NAQ).

692 Future research should focus on further validating the 13-item NAQ-R-SF by  
693 incorporating variables such as sickness absenteeism, presenteeism, recovery, and job  
694 satisfaction. Including these variables would offer a more comprehensive understanding of the  
695 measure's effectiveness and applicability across diverse contexts.

696

697

## 698 **Conclusions**

699       Based on our findings, we conclude that both short measures of WB (9-item S-NAQ, and  
700 13-item NAQ-R-SF) are suitable for both research and practical applications. However, the  
701 NAQ-R-SF, introduced in this study, may be preferred due to its exceptional item properties.  
702 The NAQ-R-SF proves particularly advantageous for researchers and practitioners aiming to  
703 apply it as a continuous assessment tool. Conversely, the S-NAQ may be more useful for  
704 researchers applying latent class analysis. IRT and validity evidence support the NAQ-R-SF  
705 as a robust tool for measuring WB, aligning with established WB constructs and individual  
706 differences.

## 707 **Acknowledgments**

708       We express our gratitude to Seburan Aliti, Mathilde Faure Lindh, Jennifer Fransson,  
709 Magdalena Palander, Carina Ragnestål-Impola, Valentina Tesouri, Davina Tesouza for their  
710 invaluable assistance with data sampling; and Björn Persson for performing the Mokken  
711 analysis.

## 712 **References**

- 713       1. Einarsen S, Raknes BI, Matthiesen SB. Bullying and harassment at work and their  
714       relationship to work environment quality: An exploratory study. *Eur Work Organ*  
715       *Psychol.* 1994;4(4):381-401.
- 716       2. Niedhammer I, Bertrais S, Witt K. Psychosocial work exposures and health outcomes:  
717       a meta-review of 72 literature reviews with meta-analysis. *Scand J Work Environ*  
718       *Health.* 2021;47(5):489-508.

- 719 3. Boudrias V, Trépanier SG, Salin D. A systematic review of research on the  
720 longitudinal consequences of workplace bullying and the mechanisms involved.  
721 *Aggress Violent Behav.* 2021;56:101508.
- 722 4. Farley S, Mokhtar D, Ng K, Niven K. What influences the relationship between  
723 workplace bullying and employee well-being? A systematic review of  
724 moderators. *Work Stress.* 2023;37(3):345-372.
- 725 5. Feijó FR, Gräf DD, Pearce N, Fassa AG. Risk factors for workplace bullying: A  
726 systematic review. *Int J Environ Res Public Health.* 2019;16(6):1945.
- 727 6. Nielsen MB, Harris A, Pallesen S, Einarsen SV. Workplace bullying and sleep—A  
728 systematic review and meta-analysis of the research literature. *Sleep Med Rev.*  
729 2020;51:101289.
- 730 7. Nielsen MB, Einarsen S. Outcomes of workplace bullying: A meta-analytic review.  
731 *Work Stress.* 2012;26(4):309-332.
- 732 8. Verkuil B, Atasayi S, Molendijk M. Workplace bullying and mental health: A meta-  
733 analysis on cross-sectional and longitudinal data. *PLoS One.* 2015;10:e0135225.
- 734 9. Nielsen MB, Glasø L, Einarsen S. Exposure to workplace harassment and the five  
735 factor model of personality: A meta-analysis. *Pers Individ Differ.* 2017;104:195-206.
- 736 10. Nielsen MB, Knardahl S. Is workplace bullying related to the personality traits of  
737 victims? A two-year prospective study. *Work Stress.* 2015;29(2):128-149.
- 738 11. Einarsen S, Hoel H, Notelaers G. Measuring exposure to bullying and harassment at  
739 work: validity, factor structure and psychometric properties of the Negative Acts  
740 Questionnaire-Revised. *Work Stress.* 2009;23(1):24-44.
- 741 12. Notelaers G, Van der Heijden B, Hoel H, Einarsen S. Measuring bullying at work with  
742 the short-negative acts questionnaire: identification of targets and criterion  
743 validity. *Work Stress.* 2019;33(1):58-75.

- 744 13. Wirth RJ, Edwards MC. Item factor analysis: Current approaches and future  
745 directions. *Psychol Methods*. 2007;12(1):58-79.
- 746 14. Houts CR, Savord A, Wirth RJ. Overview of modern measurement theory and  
747 examples of its use to measure execution function in children. *J Pediatr Neuropsychol*.  
748 2022;8(1):1-14.
- 749 15. Feijó FR, Gräf DD, Pearce N, Fassa AG. Risk Factors for Workplace Bullying: A  
750 Systematic Review. *Int J Environ Res Public Health*. 2019 May 31;16(11):1945.
- 751 16. Notelaers G, Vermunt JK, Baillien E, Einarsen S, de Witte H. Exploring risk groups  
752 workplace bullying with categorical data. *Ind Health*. 2011;49(1):73-88.
- 753 17. Sischka PE, Schmidt AF, Steffgen G. Further evidence for criterion validity and  
754 measurement invariance of the Luxembourg Workplace Mobbing Scale. *Eur J Psychol*  
755 *Assess*. 2020;36(1):32-43.
- 756 18. Dåderman AM, Ragnestål-Impola C. Workplace bullies, not their victims, score high  
757 on the dark triad and extraversion, and low on agreeableness and honesty-humility.  
758 *Heliyon*. 2019;5:e02609.
- 759 19. Caponecchia C, Costa DSJ. Examining workplace bullying measurement using item  
760 response theory. *J Manag Psychol*. 2017;32(4):333-350.
- 761 20. Norman G. Likert scales, levels of measurement and the “laws” of statistics. *Adv*  
762 *Health Sci Educ Theory Pract*. 2010;15(4):625-632.
- 763 21. Fevre RW, Robinson A, Jones T, Lewis D. Researching workplace bullying: the  
764 benefits of taking an integrated approach. *Int J Soc Res Methodol*. 2010;13(1):71-85.
- 765 22. Notelaers G, Einarsen S. The world turns at 33 and 45: Defining simple cutoff scores  
766 for the Negative Acts Questionnaire–Revised in a representative sample. *Eur J Work*  
767 *Organ Psychol*. 2013;22(5):670-682.



- 768 23. Rai A, Agarwal UA. Examining the relationship between personality traits and  
769 exposure to workplace bullying. *Glob Bus Rev.* 2019;20(5):1069-1087.
- 770 24. Rabin R, de Charro F. EQ-5D: a measure of health status from the EuroQol Group.  
771 *Ann Med.* 2001 Jul;33(5):337-43.
- 772 25. Burström K, Sun S, Gerdtham UG, Henriksson M, Johannesson M, Levin LÅ,  
773 Zethraeus N. Swedish experience-based value sets for EQ-5D health states. *Qual Life*  
774 *Res.* 2014;23(3):431-432.
- 775 26. Dåderman AM, Basinska AB. Evolutionary benefits of personality traits when facing  
776 workplace bullying. *Pers Individ Differ.* 2021;177:110849.
- 777 27. Sibley CG. The Mini-IPIP6: Item Response Theory analysis of a short measure of the  
778 big-six factors of personality in New Zealand. *N Z J Psychol.* 2012;41(1):21-31.
- 779 28. Ashton MC, Lee K. Empirical, theoretical, and practical advantages of the HEXACO  
780 model of personality structure. *Pers Soc Psychol Rev.* 2007;11(2):150-166.
- 781 29. Spector PE, Jex SM. Development of four self-report measures of job stressors and  
782 strain: Interpersonal conflict at work scale, organizational constraints scale,  
783 quantitative workload inventory, and physical symptoms inventory. *J Occup Health*  
784 *Psychol.* 1998;3(4):356-367.
- 785 30. Bowling NA, Beehr TA. Workplace harassment from victim's perspective: a  
786 theoretical model and meta-analysis. *J Appl Psychol.* 2006;91(5):998-1012.
- 787 31. Devonish D. Workplace bullying, employee performance and behaviors. *Employee*  
788 *Relat.* 2013;35(6):630-647.
- 789 32. Koopmans L, Bernaards C, Hildebrandt V, van Buuren S, van der Beek AJ, de Vet  
790 HCW. Development of an individual work performance questionnaire. *Int J Prod*  
791 *Perform Manag.* 2013;62(1):6-28.

- 792 33. Dåderman AM, Ingelgård A, Koopmans L. Cross-cultural adaptation, from Dutch to  
793 Swedish language, of the Individual Work Performance Questionnaire. *WORK J Prev*  
794 *Assess Rehabil.* 2020;65(2):97-109.
- 795 34. Dåderman AM, Kajonius PJ. Linking grandiose and vulnerable narcissism to  
796 managerial work performance, through the lens of core personality traits and social  
797 desirability. *Sci Rep.* 2024;14:12213.
- 798 35. Samejima F. Estimation of latent ability using a response pattern of graded scores.  
799 *Psychometrika Monogr Suppl.* 1969;17(4 Pt 2):386-415.
- 800 36. Reckase MD. Unifactor latent trait models applied to multifactor tests: Results and  
801 implications. *J Educ Stat.* 1979;4(3):207-230.
- 802 37. Reise SP, Waller NG. Fitting the two-parameter model to personality data. *Appl*  
803 *Psychol Meas.* 1990;14(1):45-58.
- 804 38. Van der Ark LA. New developments in Mokken scale analysis in R. *J Stat Softw.*  
805 2012;48(1):1-19.
- 806 39. Chen WH, Thissen D. Local dependence indices for item pairs using item response  
807 theory. *J Educ Behav Stat.* 1997;22(3):265-289.
- 808 40. Orlando M, Thissen D. Further investigation of the performance of  $S-\chi^2$ : An item fit  
809 index for use with dichotomous item response theory models. *Appl Psychol Meas.*  
810 2003;27(4):289-298.
- 811 41. Stone CA, Zhang B. Assessing goodness of fit of item response theory models: A  
812 comparison of traditional and alternative procedures. *J Educ Meas.* 2003;40(4):331-  
813 352.
- 814 42. Maydeu-Olivares A, Joe H. Limited information goodness-of-fit testing in  
815 multidimensional contingency tables. *Psychometrika.* 2006;71(4):713-732.

- 816 43. Maydeu-Olivares A. Goodness-of-fit assessment of item response theory models.  
817 Measurement. 2013;11(1):71-101.
- 818 44. Akaike H. A new look at the statistical model identification. IEEE Trans Autom  
819 Control. 1974;19(7):716-723.
- 820 45. Schwarz GE. Estimation the dimension of a model. Ann Stat. 1978;6(3):461-464.
- 821 46. Toland MD. Practical guide to conducting an item response theory analysis. J Early  
822 Adolesc. 2014;34(2):120-151.
- 823 47. Maydeu-Olivares A, Cai L, Hernández A. Comparing the fit of item response theory  
824 and factor analysis models. Struct Equ Model. 2011;18(3):333-356.
- 825 48. Lord FM. A broad-range tailored test of verbal ability. Appl Psychol Meas.  
826 1977;1(1):95-100.
- 827 49. Ma S, Chien T, Wang H, Li Y, Yui M. Applying computerized adaptive testing to the  
828 Negative Acts Questionnaire-Revised: Rasch analysis of workplace bullying. J Med  
829 Internet Res. 2014;16:e50.
- 830 50. Liddell TM, Kruschke JK. Analyzing ordinal data with metric models: What could  
831 possibly go wrong? J Exp Soc Psychol. 2018;79(3):328-348.
- 832 51. Robitzsch A. Why ordinal variables can (almost) always be treated as continuous  
833 variables: Clarifying assumptions of robust continuous and ordinal factor analysis  
834 estimation methods. Front Educ. 2020;5:589965.

835

836

837

**Fig 1. Visualizing a Violated Response Step Function in Item 3.**

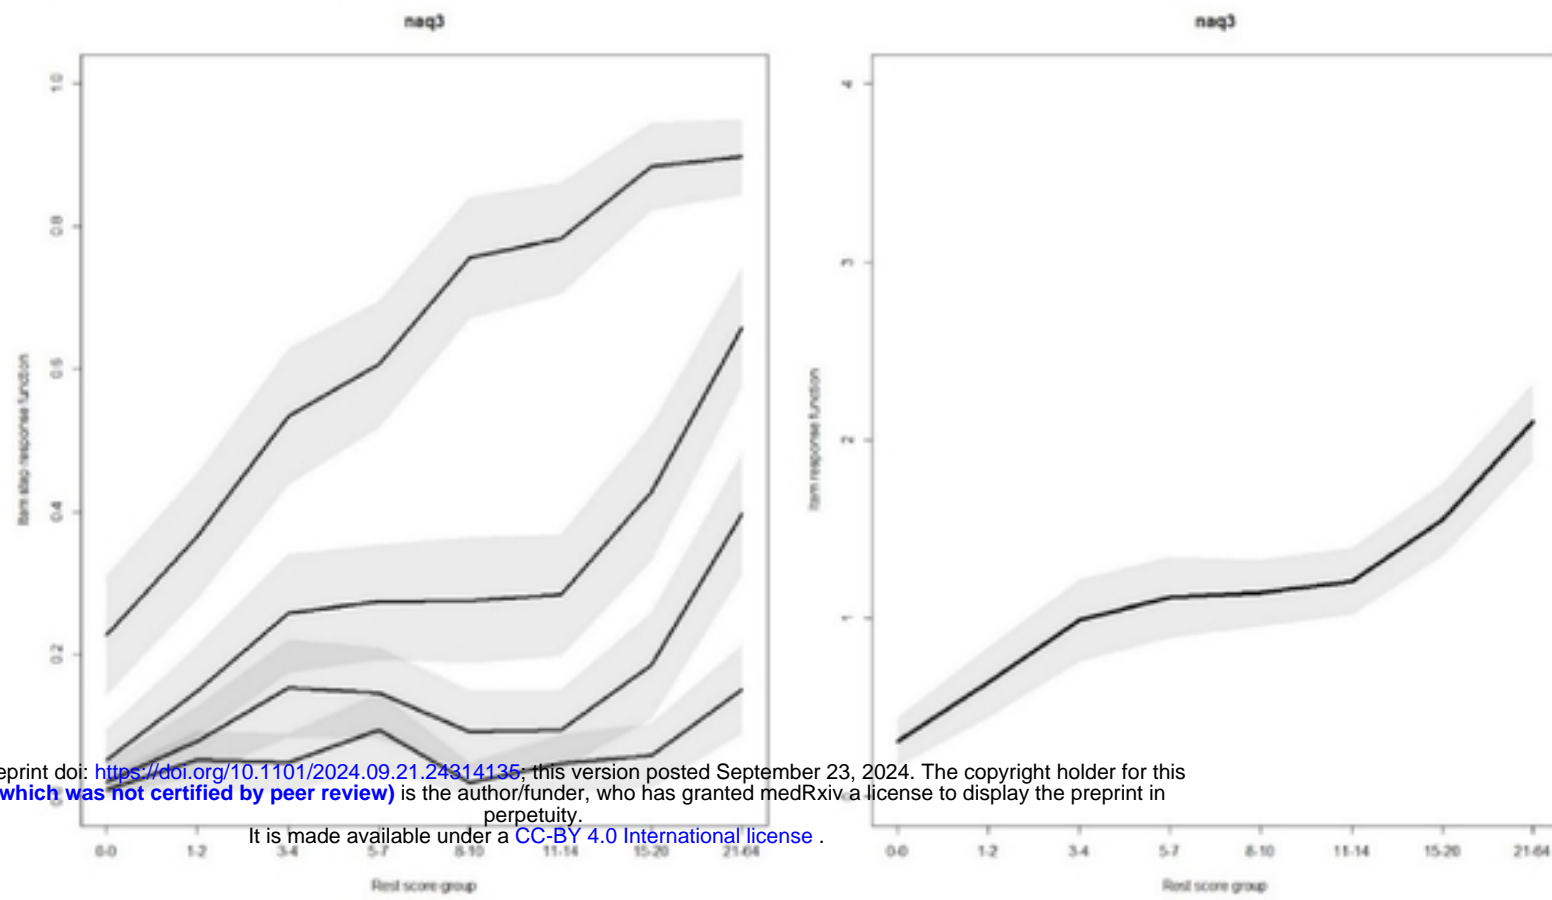

medRxiv preprint doi: <https://doi.org/10.1101/2024.09.21.24314135>; this version posted September 23, 2024. The copyright holder for this preprint (which was not certified by peer review) is the author/funder, who has granted medRxiv a license to display the preprint in perpetuity. It is made available under a [CC-BY 4.0 International license](https://creativecommons.org/licenses/by/4.0/).

*Legend.* Item 3 of the NAQ-R: “Being ordered to do work below your level of competence”. The horizontal axis depicts the latent trait (in this case, workplace bullying) of the 867 respondents of the NAQ-R, ranging from low to high values. The vertical axis represents the probability of endorsing each step of Item 3, ranging from 0 (never endorsing) to 1 (always endorsing). Each line corresponds to a step within the polytomous Item 3. The shaded area indicates the confidence interval around the estimated functions. While the lines typically show increasing functions of the latent trait, Item 3 notably violates the assumption of monotonicity.

**Fig 2. Item characteristics curves (ICC; colored lines) combined with item information functions (IIF; dashed lines) for each of the 22-items comprising NAQ-R ( $N = 867$ ).**

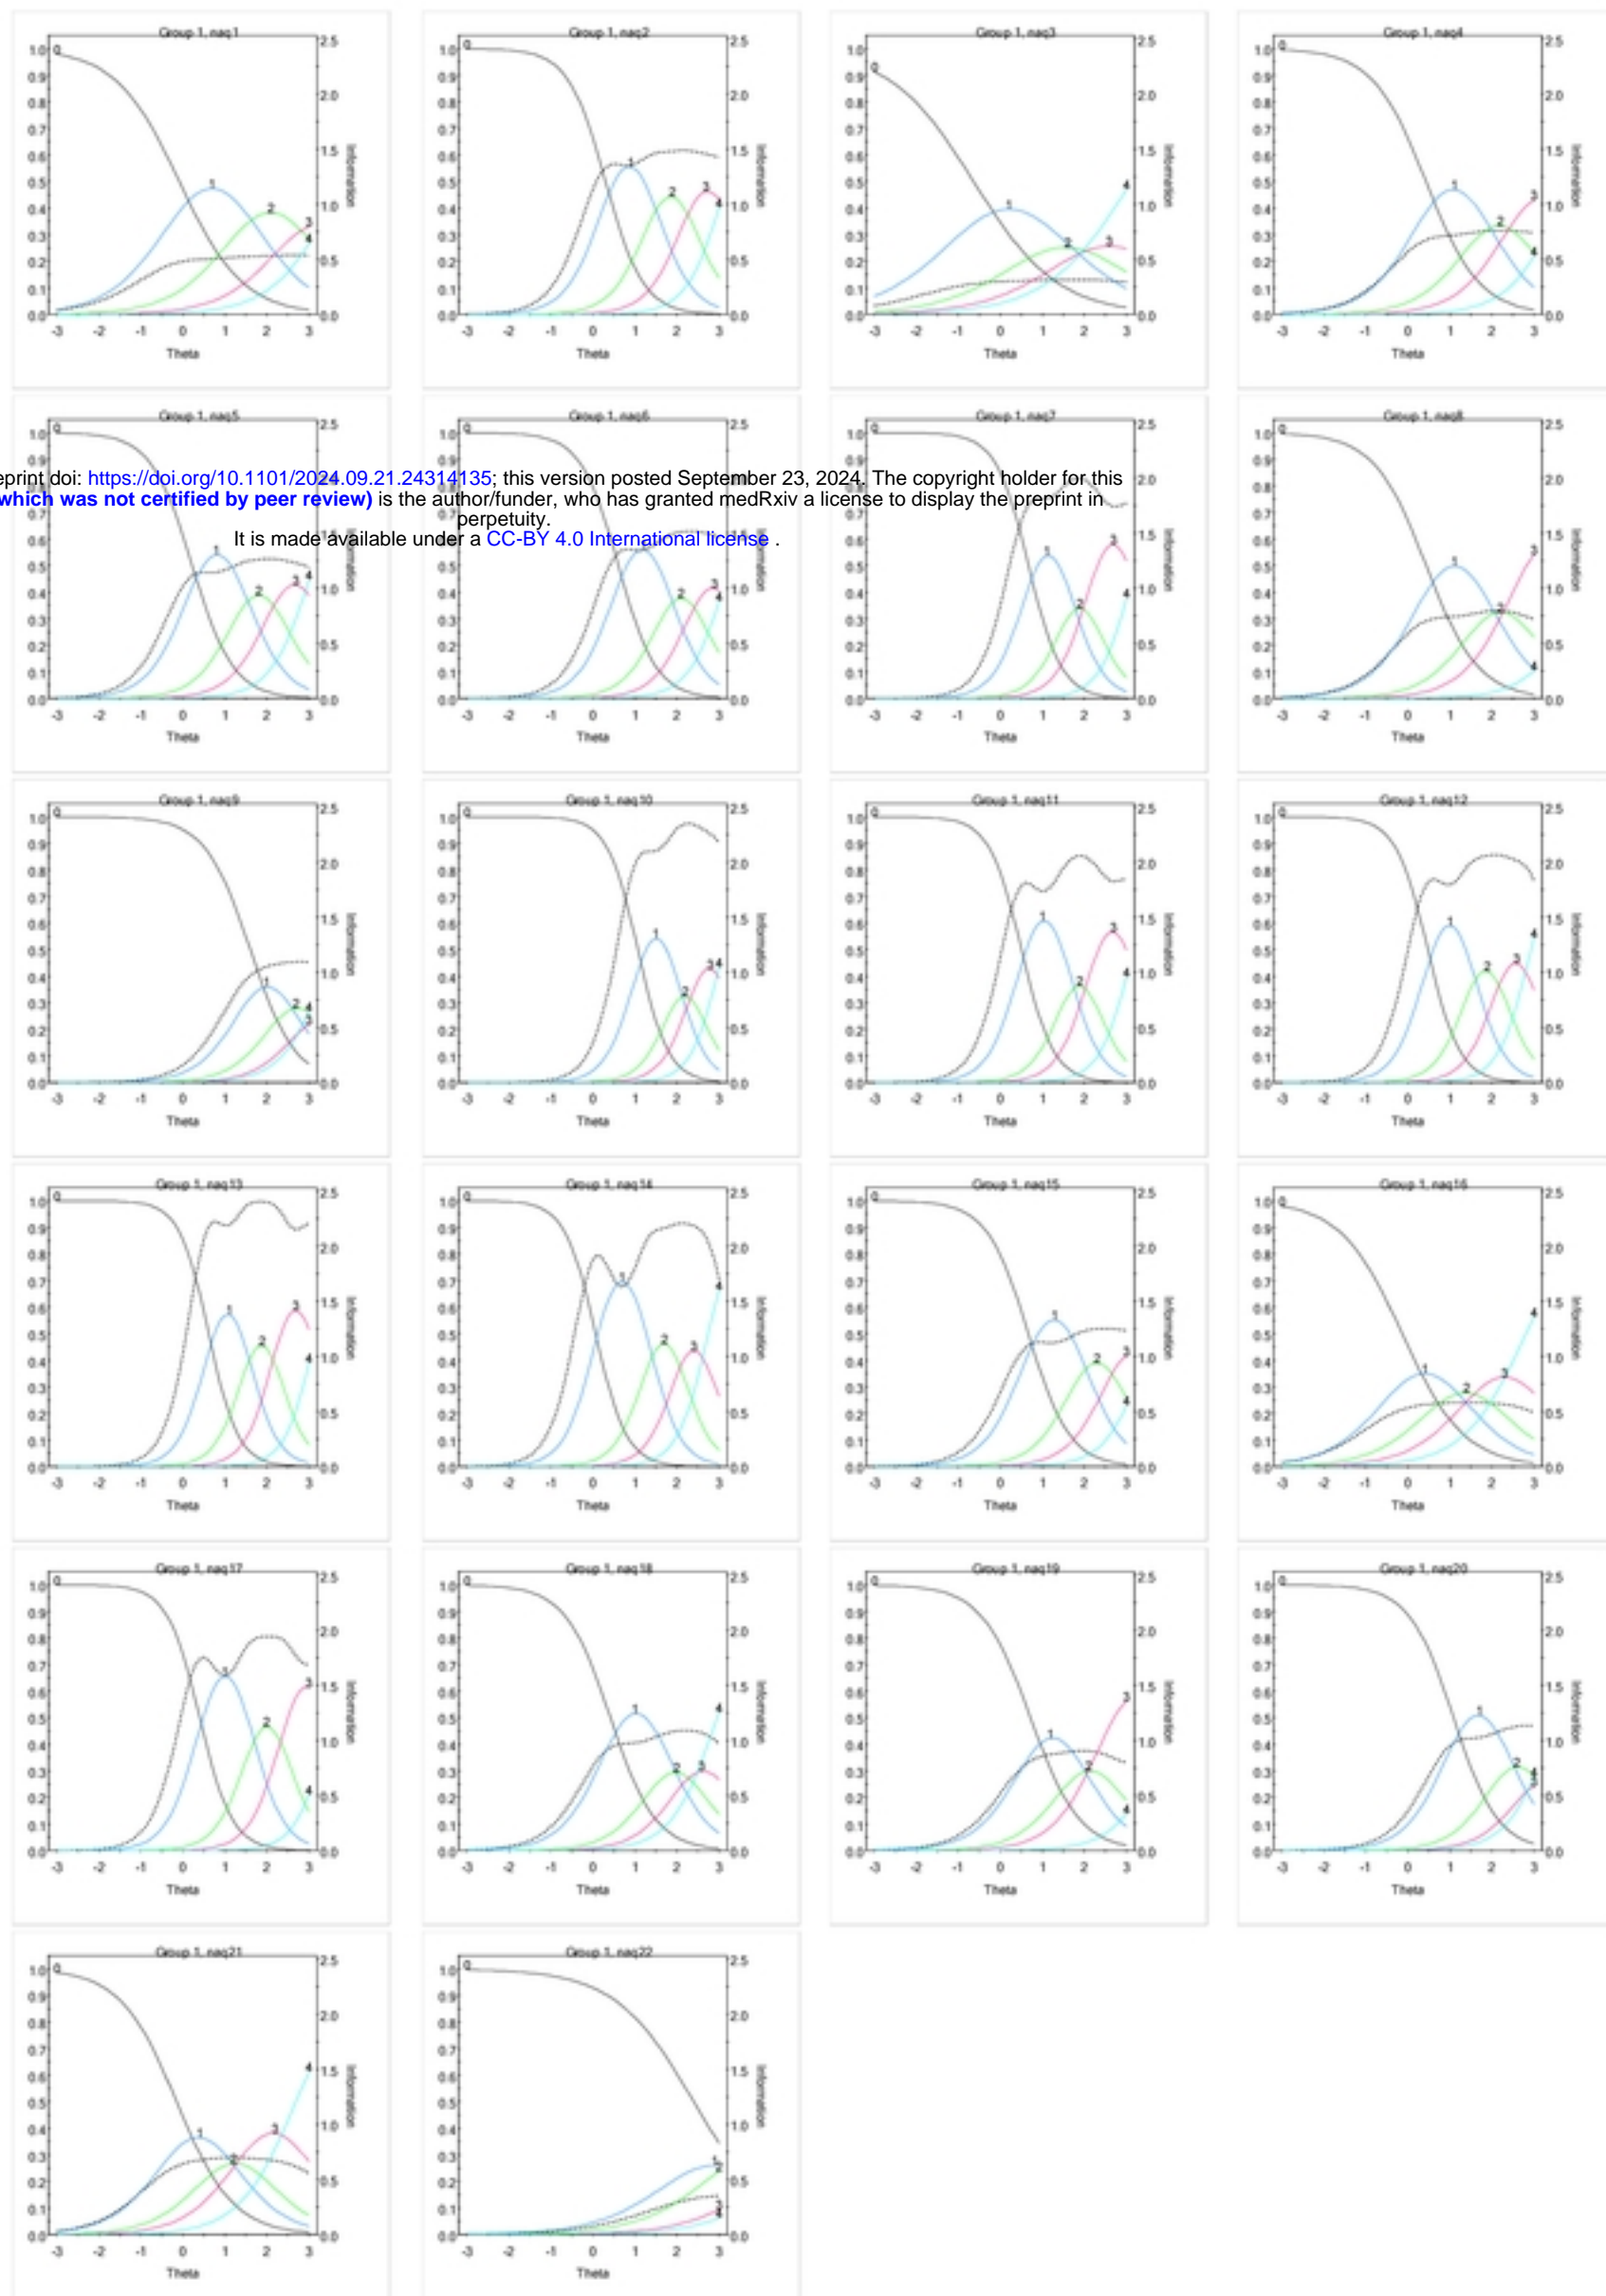



*Legend.* Labeling the sample as “Group 1” indicates that it has not been visualized with regard to subgroups, such as men and women. Each figure contains colored and dashed lines corresponding to different items in the NAQ-R. These lines, representing Item Characteristic Curves (ICCs) in color and Item Information Functions (IIFs) in dashed lines, offer graphical representations used to analyze item behavior in IRT models. Colored lines indicate how the probability of the respective response changes across the WB range, while dashed lines illustrate the amount of information the item contributes to estimating the WB level of all responders with varying WB levels. By examining both ICCs and IIFs simultaneously, valuable insights can be gained into each item’s characteristics, including item location (also known as “difficulty” or “threshold”), discrimination, and information. (See Fig. 1 for the description of horizontal and vertical axes.)

**Fig 3. Test information function (TIF) of the Workplace Bullying by 22-item NAQ-R under the graded response model ( $N = 867$ ) showing marginal reliability.**

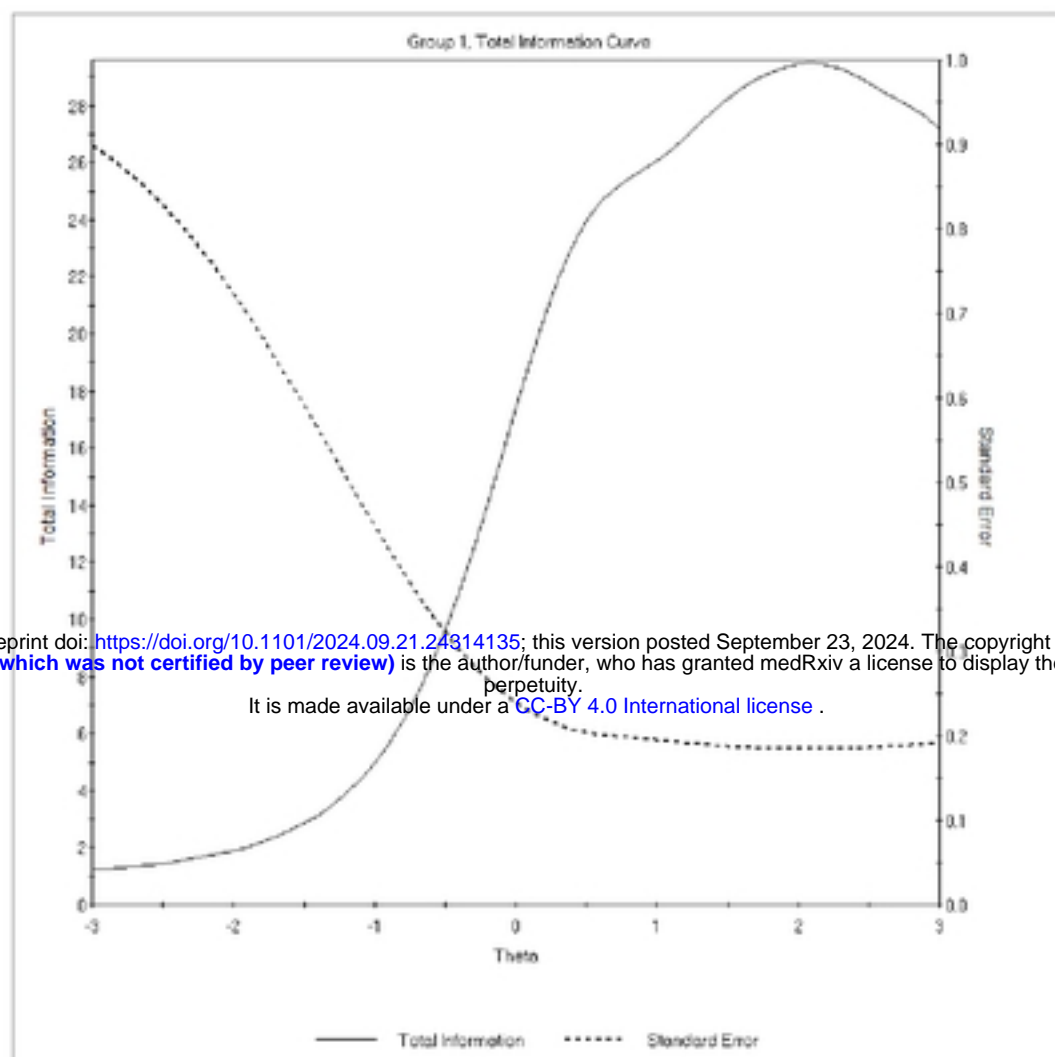

medRxiv preprint doi: <https://doi.org/10.1101/2024.09.21.24314135>; this version posted September 23, 2024. The copyright holder for this preprint (which was not certified by peer review) is the author/funder, who has granted medRxiv a license to display the preprint in perpetuity.

It is made available under a [CC-BY 4.0 International license](https://creativecommons.org/licenses/by/4.0/).

**Legend.** The horizontal axis illustrates the latent trait  $\theta$  of workplace bullying (WB), while the vertical axis represents the amount of information and the standard error provided by the NAQ-R across various levels of WB. Ranging from about 0.5 SDs above the mean to above 3.00 SDs above the mean, the amount of test information was at least 24 (which yields a standard error of estimate about 0.8). Marginal reliability was equal to or greater than 0.96 within the range described. The reliability between about -0.5 SDs below the mean and above 3 SDs above the mean was .90.
